# Supplementary material
Source: Springer Nature journal article supplement (https://www.springermedizin.de/resource/supplementary/12936_2007_389_MOESM3_ESM.pdf/9547700)

# A *P. yoelii nigeriensis* CHL091

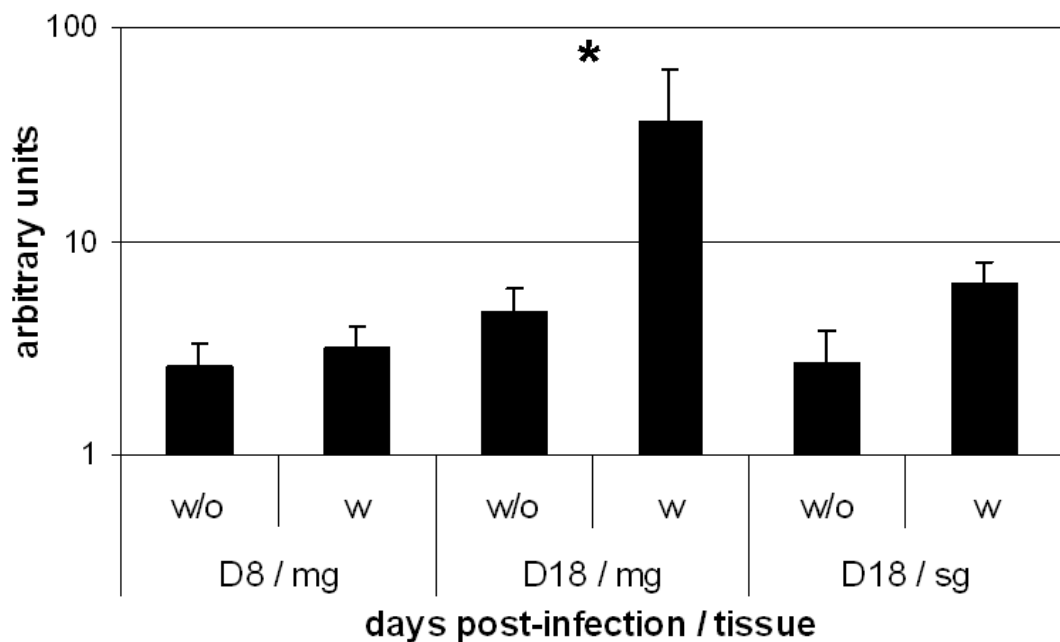

# B *P. yoelii nigeriensis* CHL055

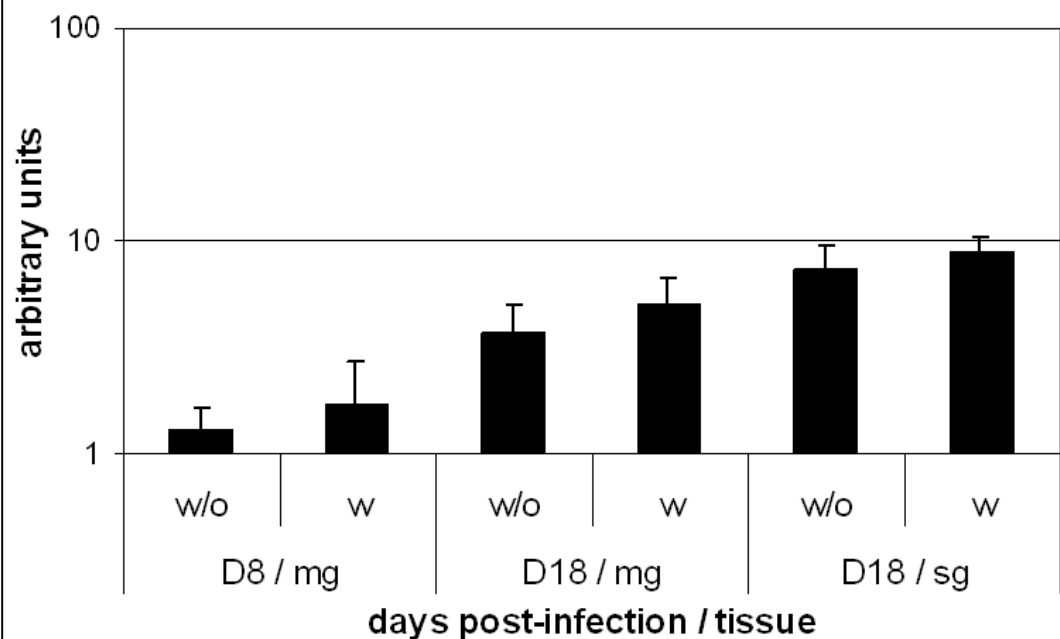

Supplement: MOESM3 [file 9547700]
